# Supplementary material for: Population Structure and Genetic Diversity of Sheep Breeds in the Kyrgyzstan
Source: Front Genet. 2019 Dec 12;10:1311. doi: 10.3389/fgene.2019.01311 (PMC6922024; doi:10.3389/fgene.2019.01311)
Supplement: Supplementary file 6 [file Table_1.xlsx]

## Sheet: Sheet1
Table S1. The joint dataset used in the study. This table provides information on the joint dataset, which includes the Kyrgyz sheep breeds and sheep breeds from across the world. The breeds are grouped according to their ancestral geographic origin (Russia, Central Europe, Southwestern Europe, Asia, Southwestern Asia, Americas).
№	Breed	Abbreviation	Color	Country (region) of sample collection	Source
	Kyrgystan
1	Alai	ALAI		Kyrgystan	This study
2	Gissar	GISR		Kyrgystan (originated in Tajikistan)	This study
3	Kyrgyz coarse wool	KYCW		Kyrgystan	This study
4	Aykol	AYKL		Kyrgystan	This study
5	Tien-Shan	TNSH		Kyrgystan	This study
	Russia
6	Andean Black	ANDB		Russia, Republic of Dagestan	Deniskova et al., 2018
7	Buubei	BUUB		Russia, Yakutia (Republic of Sakha)	Deniskova et al., 2018
8	Edilbai	EDLB		Russia, Volgograd region	Deniskova et al., 2018
9	Kalmyk	KALM		Russia, Republic of Kalmykia	Deniskova et al., 2018
10	Karakul	KARA		Russia, Astrakhan region	Deniskova et al., 2018
11	Karachaev	KRCH		Russia, Karachaev-Cherkessk Republic	Deniskova et al., 2018
12	Lezgin	LEZG		Russia, Republic of Dagestan	Deniskova et al., 2018
13	Tushin	TUSH		Russia, Republic of Dagestan	Deniskova et al., 2018
14	Tuva	TUVA		Russia, Republic of Tyva	Deniskova et al., 2018
15	Altai Mountain	ALTM		Russia, Altai region	Deniskova et al., 2018
16	Kuibyshev	KUIB		Russia, Samara region	Deniskova et al., 2018
17	North-Caucasian	NCSN		Russia, Stavropol region	Deniskova et al., 2018
18	Russian Longhaired	RULH		Russia, Voronezh region	Deniskova et al., 2018
19	Tsigai	TZYG		Russia, Saratov region	Deniskova et al., 2018
20	Dagestan Mountain	DAGM		Russia, Republic of Dagestan	Deniskova et al., 2018
21	Groznensk	GRZN		Russia, Stavropol region	Deniskova et al., 2018
22	Kulundin	KLND		Russia, Altai region	Deniskova et al., 2018
23	Manych Merino	MANM		Russia, Stavropol region	Deniskova et al., 2018
24	Salsk	SALS		Russia, Rostov region	Deniskova et al., 2018
25	Soviet Merino	SOVM		Russia, Stavropol region	Deniskova et al., 2018
26	Stavropol	STAV		Russia, Stavropol region	Deniskova et al., 2018
27	Volgograd	VOLG		Russia, Volgograd region	Deniskova et al., 2018
	Central Europe - Swiss
28	Bündner Oberländer Sheep	BOS		Switzerland	Kijas et al., 2012
29	Engadine Red Sheep	ERS		Switzerland	Kijas et al., 2012
30	Swiss Mirror Sheep	SMS		Switzerland	Kijas et al., 2012
31	Swiss White Alpine Sheep	SWA		Switzerland	Kijas et al., 2012
	South-West Europe
32	Australian Poll Merino	APM		Australia (derived from Spanish Merino)	Kijas et al., 2012
33	Australian Industry Merino	MEAI		Australia	Kijas et al., 2012
34	Appenninica	APP		Italy	Ciani et al. (2015)
35	Castellana	CAS		Spain	Kijas et al., 2012
36	Churra	CHU		Spain	Kijas et al., 2012
37	Chinese Merino	CME		China (derived from Spanish Merino)	Kijas et al., 2012
38	Comisana	COM		Italy	Ciani et al. (2015)
39	Gentile di Puglia	GEN		Italy	Ciani et al. (2015)
40	Milk Lacaune	LACM		France	Kijas et al., 2012
41	Meat Lacaune	LACL		France	Kijas et al., 2012
42	Laticauda	LAT		Italy	Ciani et al. (2015)
43	Leccese	LEC		Italy	Ciani et al. (2015)
44	Massese	MAS		Italy	Ciani et al. (2015)
45	Australian Merino	MEAU		Spain	Kijas et al., 2012
46	Merinolandschaf	MLS		Germany (derived from Spanish Merino)	Kijas et al., 2012
47	Merinizzata Italiana	MNZ		Italy	Ciani et al. (2015)
48	Ojalada	OJA		Spain	Kijas et al., 2012
49	Rasa Aragonesa	RAA		Spain	Kijas et al., 2012
50	Rambouillet	RMB		France	Kijas et al., 2012
51	Sardinian White	SAW		Italy	Ciani et al., 2015
52	Spanish Merinos Estrema Dura	SMED		Spain	Ciani et al., 2015
53	Sopravissana	SOP		Italy	Ciani et al. (2015)
54	Altamurana	ALM		Italy	Kijas et al., 2012
	Asia
55	Changthangi	CHA		China (Tibet)	Kijas et al., 2012
56	Deccani	IDC		India	Kijas et al., 2012
57	Tibetan	TIB		China (Tibet)	Kijas et al., 2012
	South-West Asia
58	Afshari	AFS		Iran	Kijas et al., 2012
59	Moghani	MOG		Iran	Kijas et al., 2012
60	Qezel	QEZ'		Iran	Kijas et al., 2012
	Americas
61	Brazilian Creole	BCS		Brazil	Kijas et al., 2012
