# Supplementary material for: Population Structure and Genetic Diversity of Sheep Breeds in the Kyrgyzstan
Source: Front Genet. 2019 Dec 12;10:1311. doi: 10.3389/fgene.2019.01311 (PMC6922024; doi:10.3389/fgene.2019.01311)
Supplement: Supplementary file 11 [file Table_6.xlsx]

## Sheet: Лист1
Table S6. Genetic differentiation (FST) between the study sheep breeds based on analysis of 38510 SNPs. For the breed description see Table S1
		1	2	3	4	5	6	7	8	9	10	11	12	13	14	15	16	17	18	19	20	21	22	23	24	25	26	27	28	29	30	31	32	33	34	35	36	37	38	39	40	41	42	43	44	45	46	47	48
		Alai	Aykol	Gissar	Kyrgyz coarse wool	Tien-Shan	Andean Black	Buubei	Edilbai	Kalmyk	Karakul	Karachaev	Tushin	Lezgin	Tuva	Altai Mountain	Kuibyshev	North-Caucasian	Russian Longhaired	Tsigai	Dagestan Mountain	Groznensk	Kulundin	Manych Merino	Salsk	Soviet Merino	Stavropol	Volgograd	Changthangi	Deccani	Tibetan	Afshari	Moghani	Qezel	Bündner Oberländer Sheep	Engadine Red Sheep	Swiss Mirror Sheep	Swiss White Alpine Sheep	Altamurana	Australian Poll Merino	Appenninica	Castellana	Churra	Chinese Merino	Comisana	Gentile di Puglia	Milk Lacaune	Milk Lacaune	Laticauda
[1]	Alai	0.0	0.029	0.03	0.036	0.066	0.06	0.053	0.035	0.034	0.037	0.042	0.039	0.039	0.034	0.06	0.075	0.088	0.097	0.055	0.065	0.067	0.087	0.073	0.076	0.069	0.076	0.076	0.054	0.075	0.069	0.058	0.039	0.035	0.108	0.084	0.105	0.109	0.082	0.081	0.088	0.073	0.08	0.095	0.075	0.096	0.09	0.093	0.069
[2]	Aykol	0.029	0.0	0.013	0.017	0.035	0.04	0.031	0.014	0.013	0.019	0.019	0.018	0.018	0.014	0.028	0.042	0.053	0.065	0.025	0.032	0.03	0.05	0.038	0.04	0.033	0.039	0.04	0.035	0.057	0.05	0.04	0.021	0.017	0.074	0.052	0.07	0.074	0.048	0.045	0.055	0.039	0.046	0.058	0.045	0.062	0.057	0.06	0.038
[3]	Gissar	0.03	0.013	0.0	0.017	0.057	0.043	0.037	0.015	0.016	0.018	0.026	0.022	0.022	0.017	0.05	0.067	0.08	0.087	0.044	0.055	0.058	0.08	0.066	0.069	0.063	0.069	0.068	0.04	0.057	0.055	0.039	0.021	0.016	0.099	0.075	0.097	0.102	0.072	0.073	0.078	0.063	0.071	0.089	0.064	0.088	0.082	0.085	0.058
[4]	Kyrgyz coarse wool	0.036	0.017	0.017	0.0	0.055	0.05	0.041	0.023	0.022	0.026	0.029	0.027	0.028	0.021	0.049	0.063	0.077	0.086	0.043	0.053	0.054	0.076	0.062	0.064	0.058	0.064	0.064	0.043	0.065	0.059	0.048	0.028	0.023	0.098	0.073	0.094	0.1	0.07	0.069	0.077	0.06	0.069	0.085	0.064	0.086	0.079	0.082	0.056
[5]	Tien-Shan	0.066	0.035	0.057	0.055	0.0	0.076	0.064	0.057	0.053	0.06	0.047	0.051	0.051	0.053	0.034	0.03	0.032	0.046	0.035	0.038	0.029	0.049	0.038	0.038	0.032	0.037	0.04	0.073	0.097	0.089	0.078	0.06	0.057	0.069	0.053	0.059	0.053	0.05	0.043	0.054	0.04	0.047	0.055	0.053	0.062	0.054	0.058	0.046
[6]	Andean Black	0.06	0.04	0.043	0.05	0.076	0.0	0.063	0.047	0.045	0.049	0.036	0.038	0.04	0.044	0.068	0.083	0.097	0.104	0.061	0.07	0.076	0.098	0.083	0.087	0.08	0.087	0.087	0.066	0.087	0.08	0.067	0.045	0.043	0.116	0.09	0.113	0.12	0.088	0.09	0.095	0.081	0.088	0.107	0.084	0.106	0.097	0.1	0.076
[7]	Buubei	0.053	0.031	0.037	0.041	0.064	0.063	0.0	0.037	0.036	0.043	0.041	0.043	0.042	0.032	0.058	0.072	0.085	0.095	0.054	0.063	0.063	0.085	0.071	0.073	0.066	0.073	0.073	0.048	0.078	0.062	0.066	0.046	0.042	0.107	0.082	0.103	0.107	0.08	0.078	0.086	0.07	0.078	0.094	0.076	0.095	0.087	0.09	0.068
[8]	Edilbai	0.035	0.014	0.015	0.023	0.057	0.047	0.037	0.0	0.004	0.023	0.027	0.026	0.025	0.016	0.05	0.066	0.08	0.088	0.045	0.056	0.059	0.08	0.066	0.069	0.063	0.069	0.068	0.038	0.061	0.053	0.046	0.026	0.021	0.1	0.075	0.097	0.103	0.073	0.073	0.079	0.064	0.071	0.089	0.066	0.089	0.082	0.085	0.059
[9]	Kalmyk	0.034	0.013	0.016	0.022	0.053	0.045	0.036	0.004	0.0	0.022	0.026	0.024	0.023	0.015	0.046	0.061	0.074	0.083	0.04	0.051	0.053	0.074	0.06	0.063	0.056	0.063	0.063	0.036	0.06	0.051	0.046	0.026	0.021	0.095	0.07	0.092	0.098	0.068	0.067	0.075	0.059	0.066	0.084	0.062	0.084	0.077	0.08	0.055
[10]	Karakul	0.037	0.019	0.018	0.026	0.06	0.049	0.043	0.023	0.022	0.0	0.031	0.027	0.028	0.022	0.052	0.069	0.082	0.091	0.046	0.058	0.06	0.082	0.068	0.071	0.065	0.071	0.071	0.044	0.06	0.06	0.044	0.025	0.02	0.103	0.077	0.1	0.106	0.074	0.074	0.081	0.064	0.072	0.091	0.067	0.09	0.084	0.087	0.06
[11]	Karachaev	0.042	0.019	0.026	0.029	0.047	0.036	0.041	0.027	0.026	0.031	0.0	0.021	0.022	0.023	0.04	0.054	0.065	0.074	0.035	0.045	0.046	0.067	0.054	0.056	0.049	0.055	0.056	0.046	0.069	0.06	0.051	0.03	0.027	0.087	0.063	0.084	0.089	0.06	0.06	0.067	0.053	0.06	0.076	0.058	0.077	0.07	0.073	0.051
[12]	Tushin	0.039	0.018	0.022	0.027	0.051	0.038	0.043	0.026	0.024	0.027	0.021	0.0	0.017	0.023	0.042	0.058	0.071	0.08	0.036	0.043	0.048	0.07	0.056	0.058	0.051	0.058	0.059	0.046	0.067	0.063	0.044	0.022	0.019	0.092	0.068	0.089	0.094	0.063	0.063	0.072	0.055	0.062	0.08	0.058	0.081	0.073	0.076	0.051
[13]	Lezgin	0.039	0.018	0.022	0.028	0.051	0.04	0.042	0.025	0.023	0.028	0.022	0.017	0.0	0.023	0.041	0.058	0.07	0.081	0.036	0.044	0.047	0.07	0.055	0.058	0.051	0.057	0.058	0.047	0.066	0.062	0.046	0.023	0.02	0.092	0.067	0.088	0.094	0.062	0.062	0.069	0.054	0.06	0.08	0.058	0.078	0.071	0.075	0.05
[14]	Tuva	0.034	0.014	0.017	0.021	0.053	0.044	0.032	0.016	0.015	0.022	0.023	0.023	0.023	0.0	0.045	0.061	0.075	0.084	0.04	0.052	0.053	0.075	0.061	0.064	0.057	0.064	0.064	0.027	0.057	0.04	0.047	0.026	0.022	0.097	0.071	0.092	0.098	0.069	0.068	0.075	0.059	0.066	0.084	0.064	0.084	0.078	0.082	0.055
[15]	Altai Mountain	0.06	0.028	0.05	0.049	0.034	0.068	0.058	0.05	0.046	0.052	0.04	0.042	0.041	0.045	0.0	0.032	0.041	0.057	0.012	0.031	0.021	0.041	0.028	0.029	0.023	0.03	0.033	0.068	0.091	0.086	0.071	0.051	0.048	0.067	0.046	0.061	0.063	0.039	0.037	0.047	0.033	0.039	0.052	0.043	0.054	0.047	0.051	0.036
[16]	Kuibyshev	0.075	0.042	0.067	0.063	0.03	0.083	0.072	0.066	0.061	0.069	0.054	0.058	0.058	0.061	0.032	0.0	0.02	0.046	0.034	0.041	0.028	0.048	0.036	0.036	0.031	0.036	0.041	0.081	0.107	0.099	0.088	0.069	0.065	0.069	0.051	0.058	0.053	0.049	0.043	0.053	0.04	0.047	0.059	0.053	0.061	0.052	0.057	0.045
[17]	North-Caucasian	0.088	0.053	0.08	0.077	0.032	0.097	0.085	0.08	0.074	0.082	0.065	0.071	0.07	0.075	0.041	0.02	0.0	0.047	0.044	0.047	0.031	0.051	0.039	0.038	0.034	0.038	0.044	0.095	0.12	0.113	0.1	0.081	0.078	0.076	0.061	0.062	0.053	0.057	0.046	0.061	0.048	0.054	0.061	0.061	0.068	0.059	0.064	0.054
[18]	Russian Longhaired	0.097	0.065	0.087	0.086	0.046	0.104	0.095	0.088	0.083	0.091	0.074	0.08	0.081	0.084	0.057	0.046	0.047	0.0	0.057	0.068	0.061	0.081	0.068	0.07	0.065	0.069	0.073	0.103	0.128	0.119	0.108	0.09	0.086	0.094	0.075	0.079	0.07	0.073	0.072	0.077	0.068	0.073	0.089	0.078	0.09	0.077	0.083	0.071
[19]	Tsigai	0.055	0.025	0.044	0.043	0.035	0.061	0.054	0.045	0.04	0.046	0.035	0.036	0.036	0.04	0.012	0.034	0.044	0.057	0.0	0.03	0.023	0.043	0.03	0.032	0.024	0.032	0.035	0.062	0.084	0.08	0.064	0.045	0.041	0.065	0.042	0.062	0.066	0.036	0.037	0.043	0.031	0.037	0.055	0.038	0.052	0.045	0.049	0.031
[20]	Dagestan Mountain	0.065	0.032	0.055	0.053	0.038	0.07	0.063	0.056	0.051	0.058	0.045	0.043	0.044	0.052	0.031	0.041	0.047	0.068	0.03	0.0	0.024	0.043	0.032	0.033	0.026	0.032	0.036	0.074	0.096	0.092	0.074	0.055	0.052	0.07	0.052	0.066	0.067	0.045	0.038	0.052	0.036	0.042	0.053	0.048	0.057	0.051	0.055	0.04
[21]	Groznensk	0.067	0.03	0.058	0.054	0.029	0.076	0.063	0.059	0.053	0.06	0.046	0.048	0.047	0.053	0.021	0.028	0.031	0.061	0.023	0.024	0.0	0.022	0.01	0.011	0.004	0.008	0.017	0.075	0.099	0.094	0.077	0.058	0.055	0.062	0.045	0.057	0.056	0.038	0.018	0.045	0.026	0.032	0.035	0.041	0.046	0.041	0.045	0.034
[22]	Kulundin	0.087	0.05	0.08	0.076	0.049	0.098	0.085	0.08	0.074	0.082	0.067	0.07	0.07	0.075	0.041	0.048	0.051	0.081	0.043	0.043	0.022	0.0	0.026	0.027	0.02	0.026	0.034	0.097	0.12	0.117	0.098	0.08	0.076	0.08	0.065	0.075	0.073	0.056	0.033	0.063	0.044	0.051	0.048	0.059	0.063	0.059	0.063	0.052
[23]	Manych Merino	0.073	0.038	0.066	0.062	0.038	0.083	0.071	0.066	0.06	0.068	0.054	0.056	0.055	0.061	0.028	0.036	0.039	0.068	0.03	0.032	0.01	0.026	0.0	0.017	0.011	0.011	0.027	0.083	0.106	0.102	0.084	0.066	0.062	0.068	0.052	0.063	0.063	0.044	0.017	0.051	0.032	0.038	0.043	0.046	0.052	0.047	0.051	0.04
[24]	Salsk	0.076	0.04	0.069	0.064	0.038	0.087	0.073	0.069	0.063	0.071	0.056	0.058	0.058	0.064	0.029	0.036	0.038	0.07	0.032	0.033	0.011	0.027	0.017	0.0	0.007	0.014	0.023	0.085	0.109	0.105	0.088	0.07	0.066	0.069	0.054	0.065	0.062	0.046	0.028	0.053	0.035	0.041	0.041	0.049	0.054	0.05	0.054	0.043
[25]	Soviet Merino	0.069	0.033	0.063	0.058	0.032	0.08	0.066	0.063	0.056	0.065	0.049	0.051	0.051	0.057	0.023	0.031	0.034	0.065	0.024	0.026	0.004	0.02	0.011	0.007	0.0	0.008	0.016	0.079	0.103	0.099	0.082	0.063	0.059	0.063	0.048	0.059	0.057	0.039	0.022	0.047	0.028	0.034	0.035	0.043	0.047	0.043	0.048	0.036
[26]	Stavropol	0.076	0.039	0.069	0.064	0.037	0.087	0.073	0.069	0.063	0.071	0.055	0.058	0.057	0.064	0.03	0.036	0.038	0.069	0.032	0.032	0.008	0.026	0.011	0.014	0.008	0.0	0.024	0.085	0.108	0.105	0.087	0.068	0.065	0.068	0.053	0.064	0.062	0.045	0.02	0.053	0.034	0.039	0.041	0.048	0.052	0.048	0.053	0.041
[27]	Volgograd	0.076	0.04	0.068	0.064	0.04	0.087	0.073	0.068	0.063	0.071	0.056	0.059	0.058	0.064	0.033	0.041	0.044	0.073	0.035	0.036	0.017	0.034	0.027	0.023	0.016	0.024	0.0	0.086	0.109	0.105	0.088	0.07	0.066	0.073	0.058	0.067	0.063	0.05	0.037	0.057	0.039	0.045	0.042	0.053	0.059	0.054	0.058	0.046
[28]	Changthangi	0.054	0.035	0.04	0.043	0.073	0.066	0.048	0.038	0.036	0.044	0.046	0.046	0.047	0.027	0.068	0.081	0.095	0.103	0.062	0.074	0.075	0.097	0.083	0.085	0.079	0.085	0.086	0.0	0.065	0.029	0.072	0.051	0.049	0.115	0.091	0.112	0.118	0.09	0.089	0.096	0.082	0.089	0.106	0.085	0.106	0.098	0.103	0.079
[29]	Deccani	0.075	0.057	0.057	0.065	0.097	0.087	0.078	0.061	0.06	0.06	0.069	0.067	0.066	0.057	0.091	0.107	0.12	0.128	0.084	0.096	0.099	0.12	0.106	0.109	0.103	0.108	0.109	0.065	0.0	0.086	0.087	0.067	0.063	0.139	0.114	0.136	0.142	0.11	0.111	0.117	0.103	0.111	0.127	0.104	0.127	0.119	0.122	0.099
[30]	Tibetan	0.069	0.05	0.055	0.059	0.089	0.08	0.062	0.053	0.051	0.06	0.06	0.063	0.062	0.04	0.086	0.099	0.113	0.119	0.08	0.092	0.094	0.117	0.102	0.105	0.099	0.105	0.105	0.029	0.086	0.0	0.088	0.068	0.065	0.132	0.107	0.129	0.135	0.108	0.108	0.112	0.1	0.107	0.124	0.103	0.123	0.116	0.119	0.097
[31]	Afshari	0.058	0.04	0.039	0.048	0.078	0.067	0.066	0.046	0.046	0.044	0.051	0.044	0.046	0.047	0.071	0.088	0.1	0.108	0.064	0.074	0.077	0.098	0.084	0.088	0.082	0.087	0.088	0.072	0.087	0.088	0.0	0.037	0.029	0.119	0.095	0.117	0.122	0.091	0.091	0.097	0.081	0.089	0.107	0.081	0.106	0.1	0.101	0.076
[32]	Moghani	0.039	0.021	0.021	0.028	0.06	0.045	0.046	0.026	0.026	0.025	0.03	0.022	0.023	0.026	0.051	0.069	0.081	0.09	0.045	0.055	0.058	0.08	0.066	0.07	0.063	0.068	0.07	0.051	0.067	0.068	0.037	0.0	0.013	0.101	0.075	0.098	0.105	0.071	0.072	0.079	0.062	0.07	0.089	0.064	0.088	0.081	0.084	0.057
[33]	Qezel	0.035	0.017	0.016	0.023	0.057	0.043	0.042	0.021	0.021	0.02	0.027	0.019	0.02	0.022	0.048	0.065	0.078	0.086	0.041	0.052	0.055	0.076	0.062	0.066	0.059	0.065	0.066	0.049	0.063	0.065	0.029	0.013	0.0	0.097	0.073	0.094	0.101	0.068	0.069	0.075	0.059	0.066	0.086	0.06	0.085	0.078	0.081	0.054
[34]	Bündner Oberländer Sheep	0.108	0.074	0.099	0.098	0.069	0.116	0.107	0.1	0.095	0.103	0.087	0.092	0.092	0.097	0.067	0.069	0.076	0.094	0.065	0.07	0.062	0.08	0.068	0.069	0.063	0.068	0.073	0.115	0.139	0.132	0.119	0.101	0.097	0.0	0.072	0.086	0.084	0.074	0.073	0.078	0.068	0.074	0.089	0.081	0.089	0.08	0.083	0.073
[35]	Engadine Red Sheep	0.084	0.052	0.075	0.073	0.053	0.09	0.082	0.075	0.07	0.077	0.063	0.068	0.067	0.071	0.046	0.051	0.061	0.075	0.042	0.052	0.045	0.065	0.052	0.054	0.048	0.053	0.058	0.091	0.114	0.107	0.095	0.075	0.073	0.072	0.0	0.07	0.08	0.051	0.056	0.052	0.048	0.055	0.076	0.057	0.07	0.058	0.062	0.051
[36]	Swiss Mirror Sheep	0.105	0.07	0.097	0.094	0.059	0.113	0.103	0.097	0.092	0.1	0.084	0.089	0.088	0.092	0.061	0.058	0.062	0.079	0.062	0.066	0.057	0.075	0.063	0.065	0.059	0.064	0.067	0.112	0.136	0.129	0.117	0.098	0.094	0.086	0.07	0.0	0.057	0.071	0.068	0.075	0.065	0.071	0.082	0.077	0.086	0.076	0.081	0.07
[37]	Swiss White Alpine Sheep	0.109	0.074	0.102	0.1	0.053	0.12	0.107	0.103	0.098	0.106	0.089	0.094	0.094	0.098	0.063	0.053	0.053	0.07	0.066	0.067	0.056	0.073	0.063	0.062	0.057	0.062	0.063	0.118	0.142	0.135	0.122	0.105	0.101	0.084	0.08	0.057	0.0	0.078	0.069	0.08	0.07	0.075	0.073	0.084	0.087	0.079	0.084	0.076
[38]	Altamurana	0.082	0.048	0.072	0.07	0.05	0.088	0.08	0.073	0.068	0.074	0.06	0.063	0.062	0.069	0.039	0.049	0.057	0.073	0.036	0.045	0.038	0.056	0.044	0.046	0.039	0.045	0.05	0.09	0.11	0.108	0.091	0.071	0.068	0.074	0.051	0.071	0.078	0.0	0.048	0.049	0.039	0.044	0.069	0.043	0.059	0.053	0.057	0.039
[39]	Australian Poll Merino	0.081	0.045	0.073	0.069	0.043	0.09	0.078	0.073	0.067	0.074	0.06	0.063	0.062	0.068	0.037	0.043	0.046	0.072	0.037	0.038	0.018	0.033	0.017	0.028	0.022	0.02	0.037	0.089	0.111	0.108	0.091	0.072	0.069	0.073	0.056	0.068	0.069	0.048	0.0	0.056	0.037	0.043	0.049	0.051	0.056	0.051	0.056	0.045
[40]	Appenninica	0.088	0.055	0.078	0.077	0.054	0.095	0.086	0.079	0.075	0.081	0.067	0.072	0.069	0.075	0.047	0.053	0.061	0.077	0.043	0.052	0.045	0.063	0.051	0.053	0.047	0.053	0.057	0.096	0.117	0.112	0.097	0.079	0.075	0.078	0.052	0.075	0.08	0.049	0.056	0.0	0.048	0.053	0.075	0.056	0.066	0.059	0.063	0.047
[41]	Castellana	0.073	0.039	0.063	0.06	0.04	0.081	0.07	0.064	0.059	0.064	0.053	0.055	0.054	0.059	0.033	0.04	0.048	0.068	0.031	0.036	0.026	0.044	0.032	0.035	0.028	0.034	0.039	0.082	0.103	0.1	0.081	0.062	0.059	0.068	0.048	0.065	0.07	0.039	0.037	0.048	0.0	0.031	0.057	0.042	0.052	0.043	0.047	0.036
[42]	Churra	0.08	0.046	0.071	0.069	0.047	0.088	0.078	0.071	0.066	0.072	0.06	0.062	0.06	0.066	0.039	0.047	0.054	0.073	0.037	0.042	0.032	0.051	0.038	0.041	0.034	0.039	0.045	0.089	0.111	0.107	0.089	0.07	0.066	0.074	0.055	0.071	0.075	0.044	0.043	0.053	0.031	0.0	0.062	0.047	0.058	0.049	0.053	0.042
[43]	Chinese Merino	0.095	0.058	0.089	0.085	0.055	0.107	0.094	0.089	0.084	0.091	0.076	0.08	0.08	0.084	0.052	0.059	0.061	0.089	0.055	0.053	0.035	0.048	0.043	0.041	0.035	0.041	0.042	0.106	0.127	0.124	0.107	0.089	0.086	0.089	0.076	0.082	0.073	0.069	0.049	0.075	0.057	0.062	0.0	0.071	0.074	0.07	0.075	0.065
[44]	Comisana	0.075	0.045	0.064	0.064	0.053	0.084	0.076	0.066	0.062	0.067	0.058	0.058	0.058	0.064	0.043	0.053	0.061	0.078	0.038	0.048	0.041	0.059	0.046	0.049	0.043	0.048	0.053	0.085	0.104	0.103	0.081	0.064	0.06	0.081	0.057	0.077	0.084	0.043	0.051	0.056	0.042	0.047	0.071	0.0	0.065	0.057	0.06	0.041
[45]	Gentile di Puglia	0.096	0.062	0.088	0.086	0.062	0.106	0.095	0.089	0.084	0.09	0.077	0.081	0.078	0.084	0.054	0.061	0.068	0.09	0.052	0.057	0.046	0.063	0.052	0.054	0.047	0.052	0.059	0.106	0.127	0.123	0.106	0.088	0.085	0.089	0.07	0.086	0.087	0.059	0.056	0.066	0.052	0.058	0.074	0.065	0.0	0.066	0.07	0.056
[46]	Milk Lacaune	0.09	0.057	0.082	0.079	0.054	0.097	0.087	0.082	0.077	0.084	0.07	0.073	0.071	0.078	0.047	0.052	0.059	0.077	0.045	0.051	0.041	0.059	0.047	0.05	0.043	0.048	0.054	0.098	0.119	0.116	0.1	0.081	0.078	0.08	0.058	0.076	0.079	0.053	0.051	0.059	0.043	0.049	0.07	0.057	0.066	0.0	0.033	0.051
[47]	Milk Lacaune	0.093	0.06	0.085	0.082	0.058	0.1	0.09	0.085	0.08	0.087	0.073	0.076	0.075	0.082	0.051	0.057	0.064	0.083	0.049	0.055	0.045	0.063	0.051	0.054	0.048	0.053	0.058	0.103	0.122	0.119	0.101	0.084	0.081	0.083	0.062	0.081	0.084	0.057	0.056	0.063	0.047	0.053	0.075	0.06	0.07	0.033	0.0	0.055
[48]	Laticauda	0.069	0.038	0.058	0.056	0.046	0.076	0.068	0.059	0.055	0.06	0.051	0.051	0.05	0.055	0.036	0.045	0.054	0.071	0.031	0.04	0.034	0.052	0.04	0.043	0.036	0.041	0.046	0.079	0.099	0.097	0.076	0.057	0.054	0.073	0.051	0.07	0.076	0.039	0.045	0.047	0.036	0.042	0.065	0.041	0.056	0.051	0.055	0.0
[49]	Leccese	0.076	0.043	0.066	0.064	0.046	0.082	0.074	0.068	0.062	0.068	0.055	0.057	0.057	0.062	0.035	0.044	0.053	0.069	0.032	0.042	0.034	0.053	0.041	0.043	0.037	0.043	0.048	0.085	0.107	0.103	0.086	0.066	0.062	0.07	0.043	0.067	0.074	0.031	0.046	0.045	0.036	0.042	0.067	0.038	0.058	0.05	0.054	0.036
[50]	Massese	0.096	0.062	0.086	0.085	0.061	0.102	0.093	0.087	0.082	0.089	0.073	0.077	0.077	0.082	0.054	0.06	0.068	0.084	0.049	0.059	0.051	0.071	0.057	0.06	0.053	0.059	0.064	0.102	0.126	0.121	0.106	0.086	0.083	0.086	0.06	0.084	0.09	0.054	0.061	0.059	0.052	0.058	0.083	0.06	0.072	0.065	0.068	0.052
[51]	Australian Industry Merino	0.08	0.045	0.072	0.068	0.044	0.089	0.077	0.072	0.067	0.074	0.06	0.062	0.061	0.067	0.036	0.043	0.047	0.072	0.036	0.037	0.017	0.033	0.018	0.027	0.021	0.02	0.036	0.089	0.11	0.107	0.09	0.072	0.069	0.072	0.056	0.069	0.07	0.048	0.008	0.055	0.035	0.042	0.048	0.051	0.055	0.05	0.055	0.045
[52]	Australian Merino	0.078	0.043	0.071	0.066	0.041	0.086	0.075	0.07	0.065	0.072	0.058	0.06	0.059	0.065	0.033	0.041	0.044	0.069	0.034	0.034	0.014	0.032	0.017	0.025	0.018	0.018	0.034	0.087	0.108	0.105	0.088	0.07	0.067	0.07	0.053	0.066	0.067	0.045	0.009	0.053	0.033	0.039	0.046	0.049	0.052	0.049	0.053	0.042
[53]	Merinolandschaf	0.092	0.057	0.084	0.08	0.053	0.101	0.09	0.084	0.079	0.086	0.072	0.075	0.074	0.08	0.049	0.055	0.06	0.083	0.048	0.046	0.039	0.055	0.045	0.046	0.039	0.045	0.05	0.101	0.123	0.119	0.104	0.084	0.081	0.078	0.066	0.076	0.077	0.059	0.051	0.065	0.049	0.054	0.063	0.063	0.068	0.062	0.066	0.056
[54]	Merinizzata Italiana	0.085	0.05	0.078	0.074	0.036	0.093	0.082	0.078	0.072	0.081	0.064	0.068	0.067	0.072	0.038	0.036	0.037	0.057	0.04	0.042	0.03	0.047	0.037	0.036	0.031	0.037	0.037	0.094	0.117	0.111	0.097	0.079	0.075	0.067	0.056	0.05	0.021	0.05	0.043	0.055	0.043	0.048	0.05	0.056	0.06	0.054	0.059	0.048
[55]	Ojalada	0.074	0.04	0.065	0.063	0.04	0.082	0.072	0.065	0.06	0.067	0.054	0.056	0.055	0.061	0.033	0.039	0.046	0.065	0.031	0.036	0.025	0.044	0.032	0.035	0.028	0.033	0.039	0.083	0.104	0.1	0.082	0.064	0.061	0.067	0.049	0.063	0.065	0.04	0.036	0.046	0.026	0.029	0.056	0.043	0.052	0.043	0.047	0.037
[56]	Rasa Aragonesa	0.063	0.029	0.054	0.051	0.029	0.071	0.06	0.055	0.049	0.056	0.043	0.045	0.043	0.049	0.021	0.028	0.035	0.056	0.019	0.023	0.013	0.03	0.019	0.021	0.015	0.02	0.026	0.072	0.093	0.09	0.072	0.053	0.05	0.056	0.037	0.052	0.055	0.027	0.024	0.036	0.015	0.021	0.043	0.031	0.04	0.031	0.034	0.025
[57]	Rambouillet	0.094	0.056	0.088	0.083	0.047	0.104	0.09	0.088	0.082	0.09	0.073	0.077	0.076	0.083	0.044	0.049	0.047	0.078	0.049	0.047	0.026	0.039	0.035	0.03	0.023	0.031	0.029	0.104	0.126	0.123	0.106	0.088	0.085	0.08	0.069	0.073	0.061	0.062	0.046	0.068	0.05	0.056	0.043	0.066	0.067	0.064	0.069	0.059
[58]	Sardinian White	0.1	0.066	0.091	0.089	0.066	0.109	0.098	0.093	0.087	0.093	0.081	0.084	0.083	0.088	0.059	0.065	0.073	0.091	0.056	0.062	0.053	0.071	0.059	0.062	0.055	0.06	0.067	0.11	0.13	0.128	0.109	0.091	0.087	0.093	0.071	0.089	0.094	0.058	0.063	0.068	0.055	0.06	0.084	0.059	0.078	0.068	0.072	0.057
[59]	Spanish Merinos Estrema Dura	0.073	0.036	0.065	0.062	0.034	0.084	0.071	0.066	0.06	0.067	0.053	0.055	0.054	0.06	0.026	0.034	0.04	0.066	0.027	0.028	0.014	0.031	0.021	0.022	0.015	0.021	0.025	0.083	0.107	0.102	0.084	0.064	0.061	0.065	0.047	0.06	0.058	0.038	0.026	0.047	0.025	0.031	0.039	0.041	0.046	0.041	0.046	0.033
[60]	Sopravissana	0.073	0.038	0.065	0.061	0.037	0.081	0.069	0.065	0.059	0.066	0.052	0.054	0.053	0.06	0.028	0.036	0.042	0.062	0.027	0.032	0.02	0.037	0.026	0.027	0.021	0.027	0.031	0.082	0.102	0.1	0.083	0.064	0.061	0.064	0.045	0.058	0.059	0.035	0.032	0.042	0.029	0.034	0.047	0.041	0.045	0.043	0.047	0.032
[61]	Barbados Black Belly	0.079	0.045	0.069	0.066	0.039	0.087	0.076	0.069	0.064	0.069	0.058	0.061	0.06	0.064	0.039	0.037	0.042	0.058	0.039	0.044	0.035	0.055	0.041	0.044	0.038	0.042	0.048	0.086	0.109	0.104	0.09	0.07	0.066	0.076	0.058	0.066	0.062	0.052	0.046	0.058	0.041	0.046	0.064	0.054	0.063	0.056	0.06	0.048
[truncated: 13 more columns]
